# Supplementary material for: Single crystal titanate–zirconate nanoleaf: Synthesis, growth mechanism and enhanced photocatalytic hydrogen evolution properties
Source: Royal Society of Chemistry journal article supplement (doi:10.1039/c1ce06088k), 2012-01-01
Supplement: c1ce06088k.pdf [file c1ce06088k.pdf]

**Figure S1 (a)** TEM-EDS\_of nanoleaf in microsisal\_

**(b)** Electron energy-loss spectroscopy (EELS) of nanoleaf\_

**(a)**

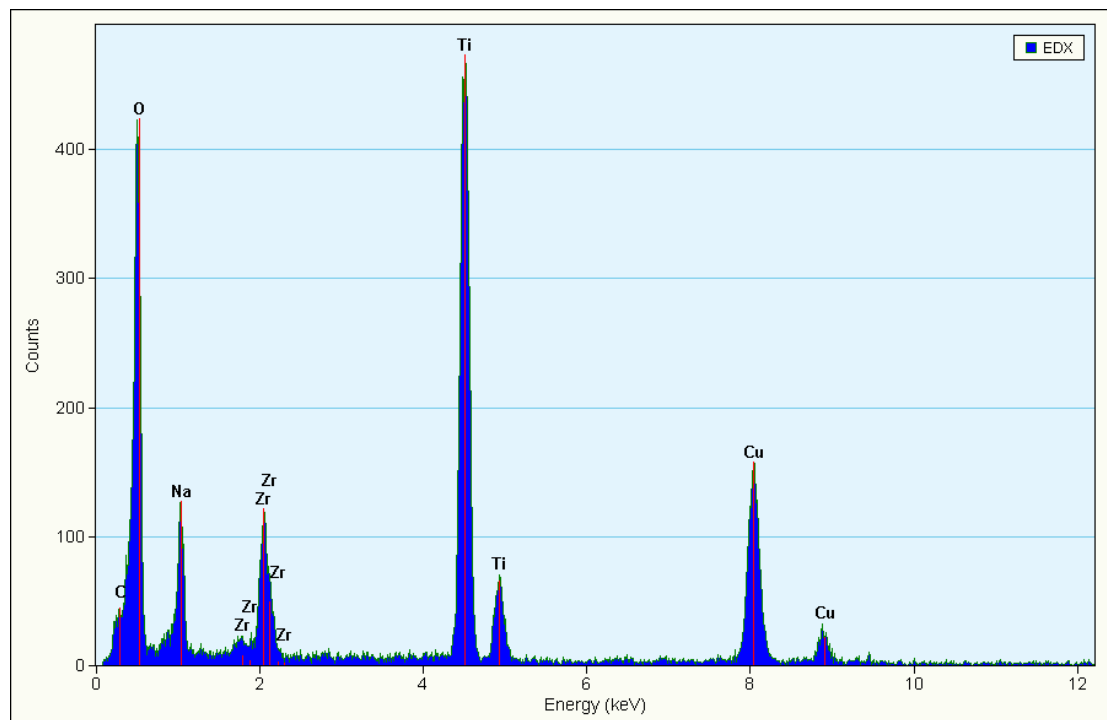

(b)

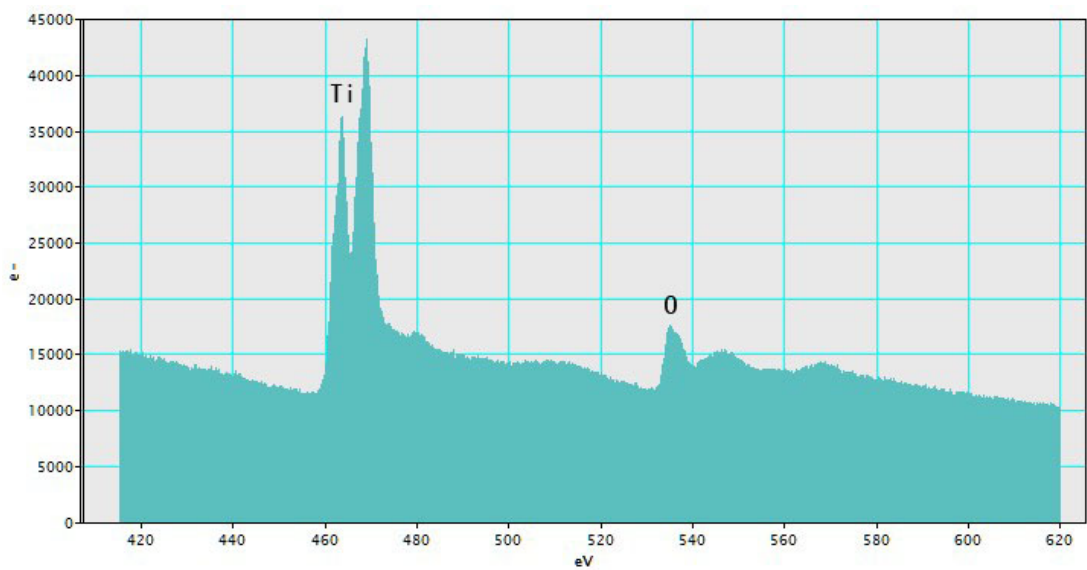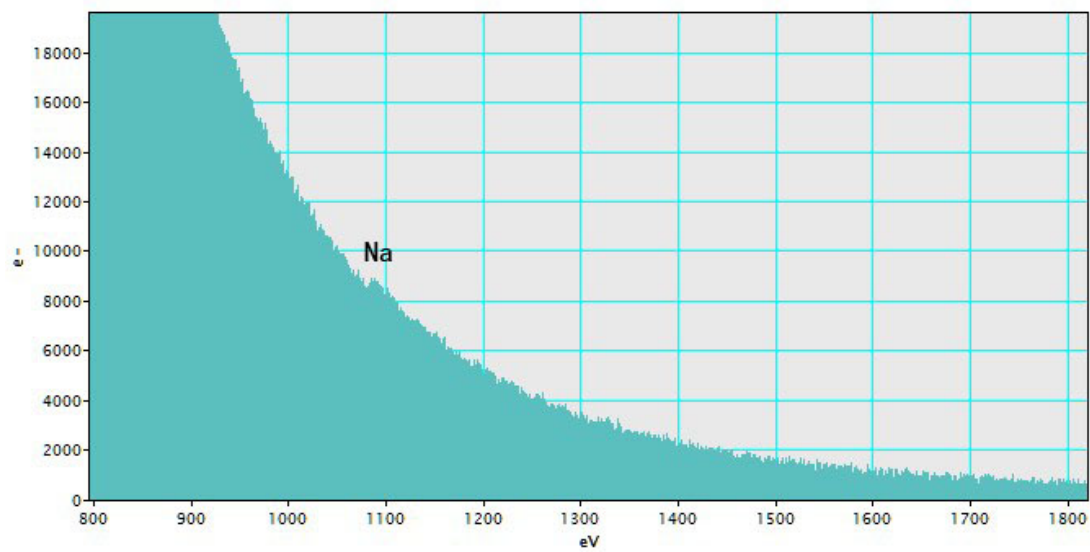

**Figure S2** Fourier transforms and fitting of Zr K-edge EXAFS in R space (experiment data: red open circle; fitting data: black solid line).

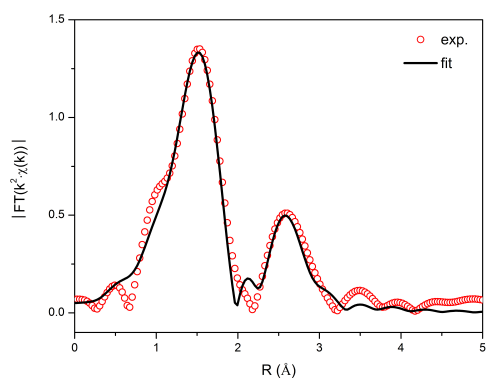

**Figure S3** Fourier transforms and fitting of Ti K-edge EXAFS in R space (experiment data: red open circle; fitting data: black solid line).

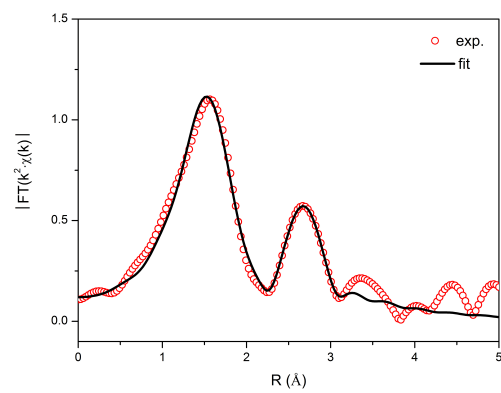

**Figure S4** Cross-sectional view of the  $\text{Na}_2(\text{Ti}_{0.8}\text{Zr}_{0.2})_4\text{O}_9$  microspiral attached to the BMG substrate.

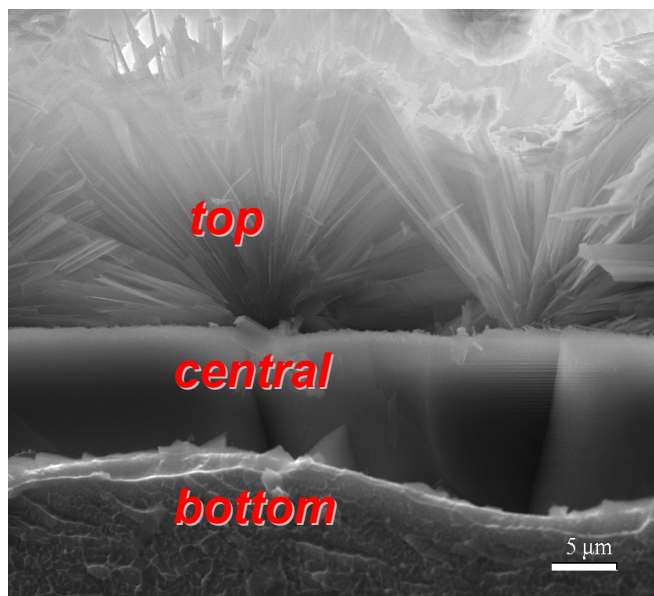

**Figure S5** The ferroelectric hysteresis loop for the  $\text{Na}_2(\text{Ti}_{0.8}\text{Zr}_{0.2})_4\text{O}_9$  microsisal.

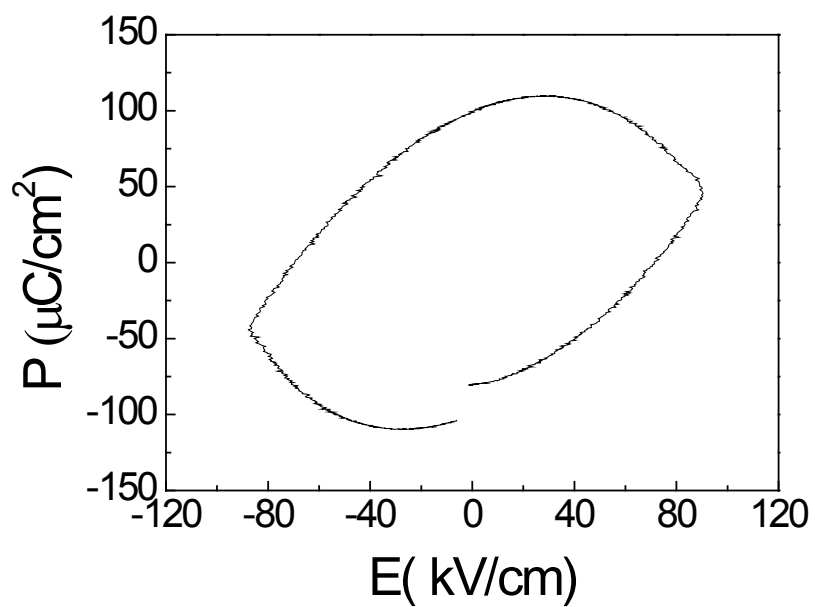

**Figure S6** Relative permittivity versus temperature plots at 100 kHz for the  $\text{Na}_2(\text{Ti}_{0.8}\text{Zr}_{0.2})_4\text{O}_9$  microsilal.

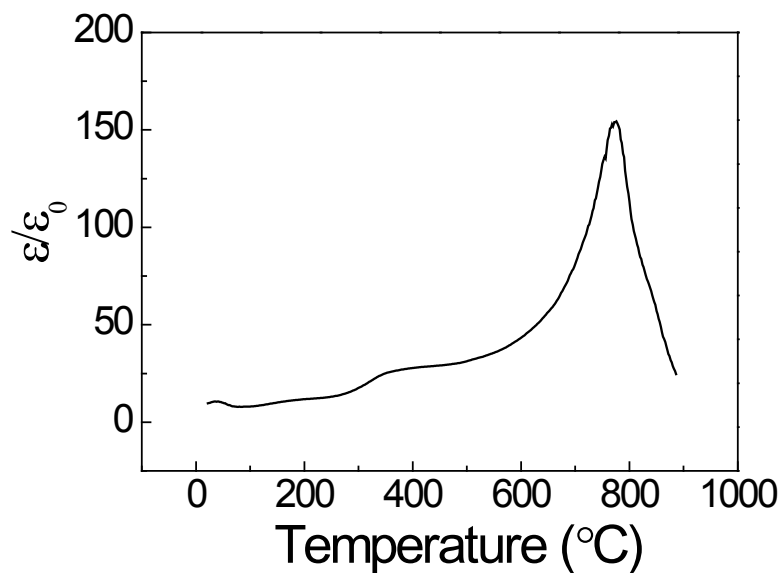

**Table S1** Zr, Ti K edge EXAFS coordination parameters of Na<sub>2</sub>(Ti<sub>0.75</sub>Zr<sub>0.25</sub>)<sub>4</sub>O<sub>9</sub> nanoleafs

|             | <b>Shell</b> | <b>N</b> | <b>R (Å)</b> | <b>σ<sup>2</sup> (10<sup>-3</sup> Å<sup>2</sup>)</b> | <b>ΔE<sub>0</sub> (eV)</b> |
|-------------|--------------|----------|--------------|------------------------------------------------------|----------------------------|
| Nanoleaf-Zr | Zr-O         | 5.8±1.1  | 2.12±0.02    | 7.9±1.8                                              | -4.5±1.3                   |
|             | Zr-Ti        | 2.6±0.6  | 3.26±0.02    | 6.7±1.2                                              | -4.6±0.8                   |
|             | <b>Shell</b> | <b>N</b> | <b>R (Å)</b> | <b>σ<sup>2</sup> (10<sup>-3</sup> Å<sup>2</sup>)</b> | <b>ΔE<sub>0</sub> (eV)</b> |
| Nanoleaf-Ti | Ti-O         | 4.2±0.7  | 1.95±0.01    | 11.9±0.1                                             | 9.9±0.7                    |
|             | Ti-Ti        | 4.6±0.4  | 3.07±0.01    | 14.9±1.1                                             | 1.8±1.2                    |
|             | Ti-Zr        | 1.1±0.1  | 3.23±0.02    | 17.4±1.0                                             | 6.9±3.1                    |



**Table S2** The ICP results for water solution ( $10^{-5}$  M) at different duration times.

| <b>Element</b> | <b>1h</b> | <b>4h</b> | <b>8h</b> | <b>15h</b> |
|----------------|-----------|-----------|-----------|------------|
| Be             | 8.145     | 22.053    | 53.274    | 180.808    |
| Zr             | 7.122     | 15.95     | 22.024    | 21.344     |
| Ti             | 1.074     | 0.357     | 0.677     | 0.094      |
| Ni             | none      | none      | none      | none       |
| Cu             | none      | none      | none      | none       |

**Table S3** The EDS results at different sites along the cross-section of the microsilal attached BMG sample. Top, central and bottom correspond to the microsilal, transition layer and BMG substrate, respectively, in Fig. S4.

| Element | Top / at% | Central / at% | Bottom / at% |
|---------|-----------|---------------|--------------|
| OK      | 64.99     | 70.08         |              |
| NaK     | 15.79     | 14.88         |              |
| ZrL     | 04.21     | 0.20          | 33.70        |
| TiK     | 15.02     | 6.79          | 51.13        |
| NiK     |           | 1.92          | 03.36        |
| CuK     |           | 6.13          | 11.81        |
